# Supplementary material
Source: PubMed Central journal article supplement (PMC409906)

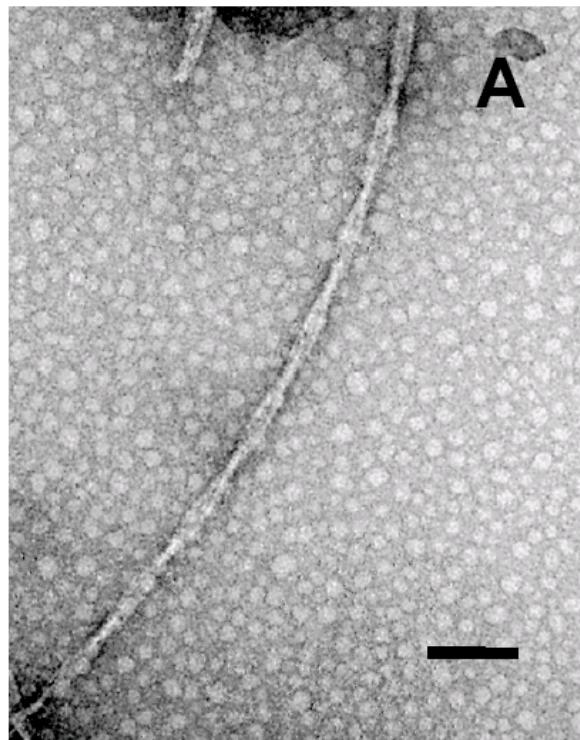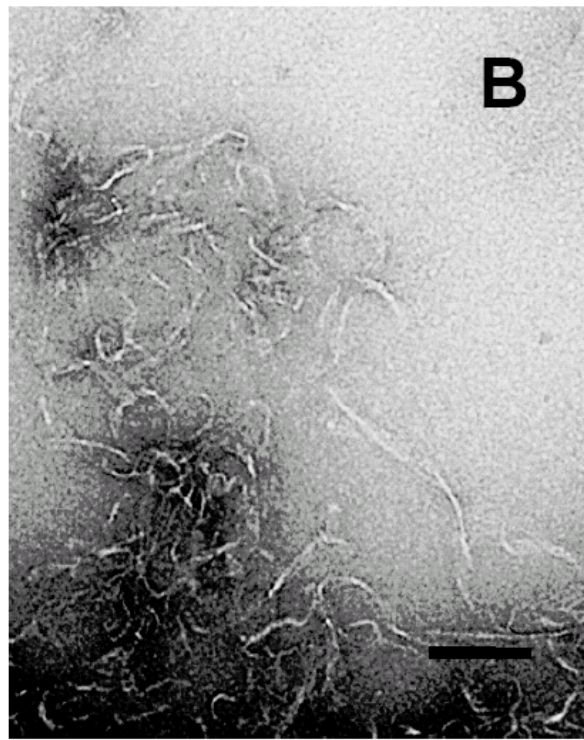

Supplement: pnas_101_19_7258__2.pdf [file pnas_101_19_7258__2.pdf]
